# Supplementary material for: LGI3/2–ADAM23 interactions cluster Kv1 channels in myelinated axons to regulate refractory period
Source: PubMed Central journal article supplement (PMC9997507; doi:10.1083/jcb.202211031), 2023-02-24
Supplement: JCB_202211031_SourceDataF5.pdf [file JCB_202211031_SourceDataF5.pdf]

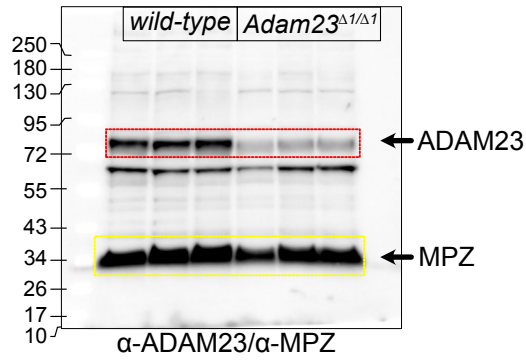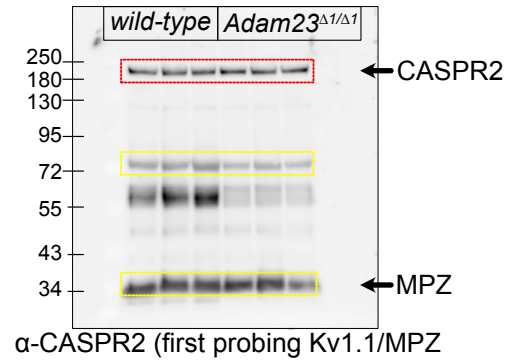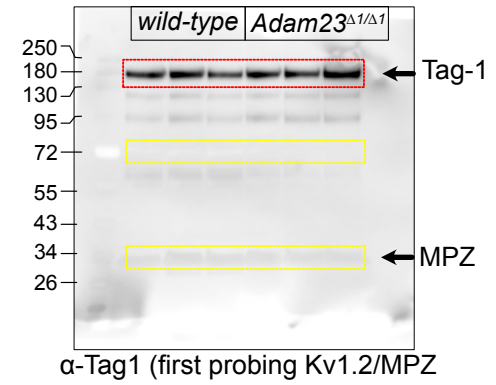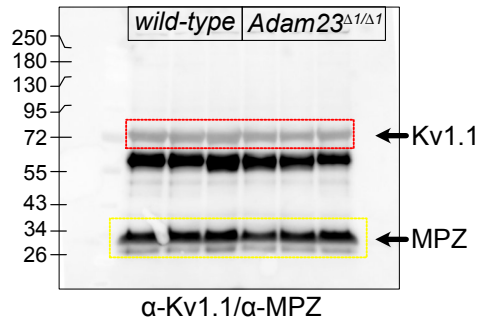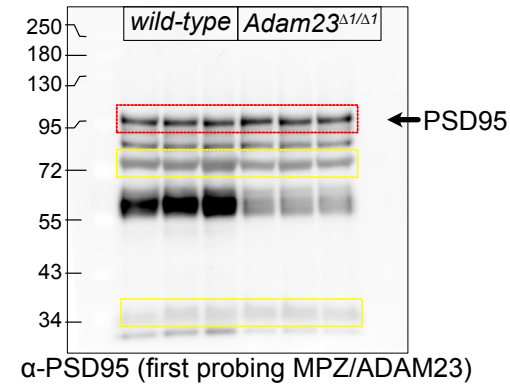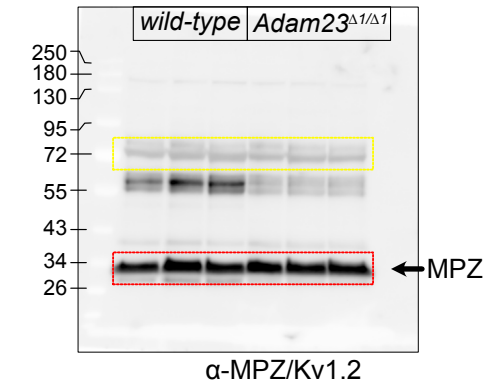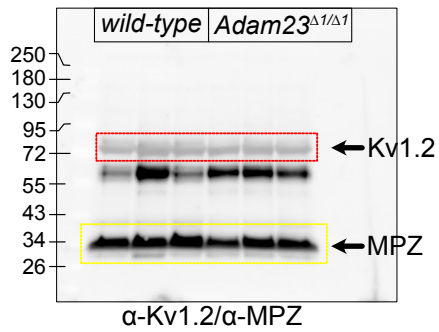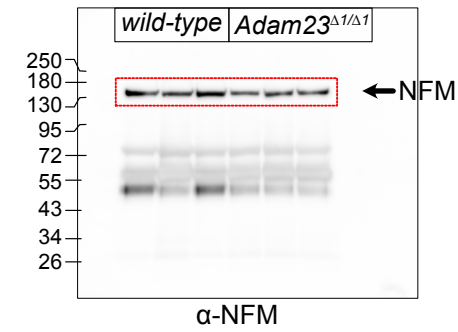

Source data Figure 5 Kozar-Gillen et al
